# Supplementary material for: Do Patients with Bronchiectasis Have an Increased Risk of Developing Lung Cancer? A Systematic Review
Source: Life (Basel). 2023 Feb 7;13(2):459. doi: 10.3390/life13020459 (PMC9961135; doi:10.3390/life13020459)
Supplement: Supplementary file 1 [file life-13-00459-s001.zip]

Archive with 4 entries (4 files):
- S1 File- Prisma Checklist.pdf
- S2 File Prospero protocol.pdf
- Table S1- search strategy.pdf
- Table S2- Results corretta.pdf
